# Supplementary material
Source: Copernicus journal article supplement (doi:10.5194/acp-26-7705-2026)
Supplement: Supplementary file 1 [file acp-26-7705-2026-supplement.pdf]

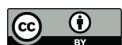

*Supplement of*

## **Advancing the quantification of aerosol-cloud interactions with the CALIPSO-CloudSat-Aqua/MODIS record**

**Zhujun Li et al.**

*Correspondence to:* David Painemal ([david.painemal@nasa.gov](mailto:david.painemal@nasa.gov))

The copyright of individual parts of the supplement might differ from the article licence.

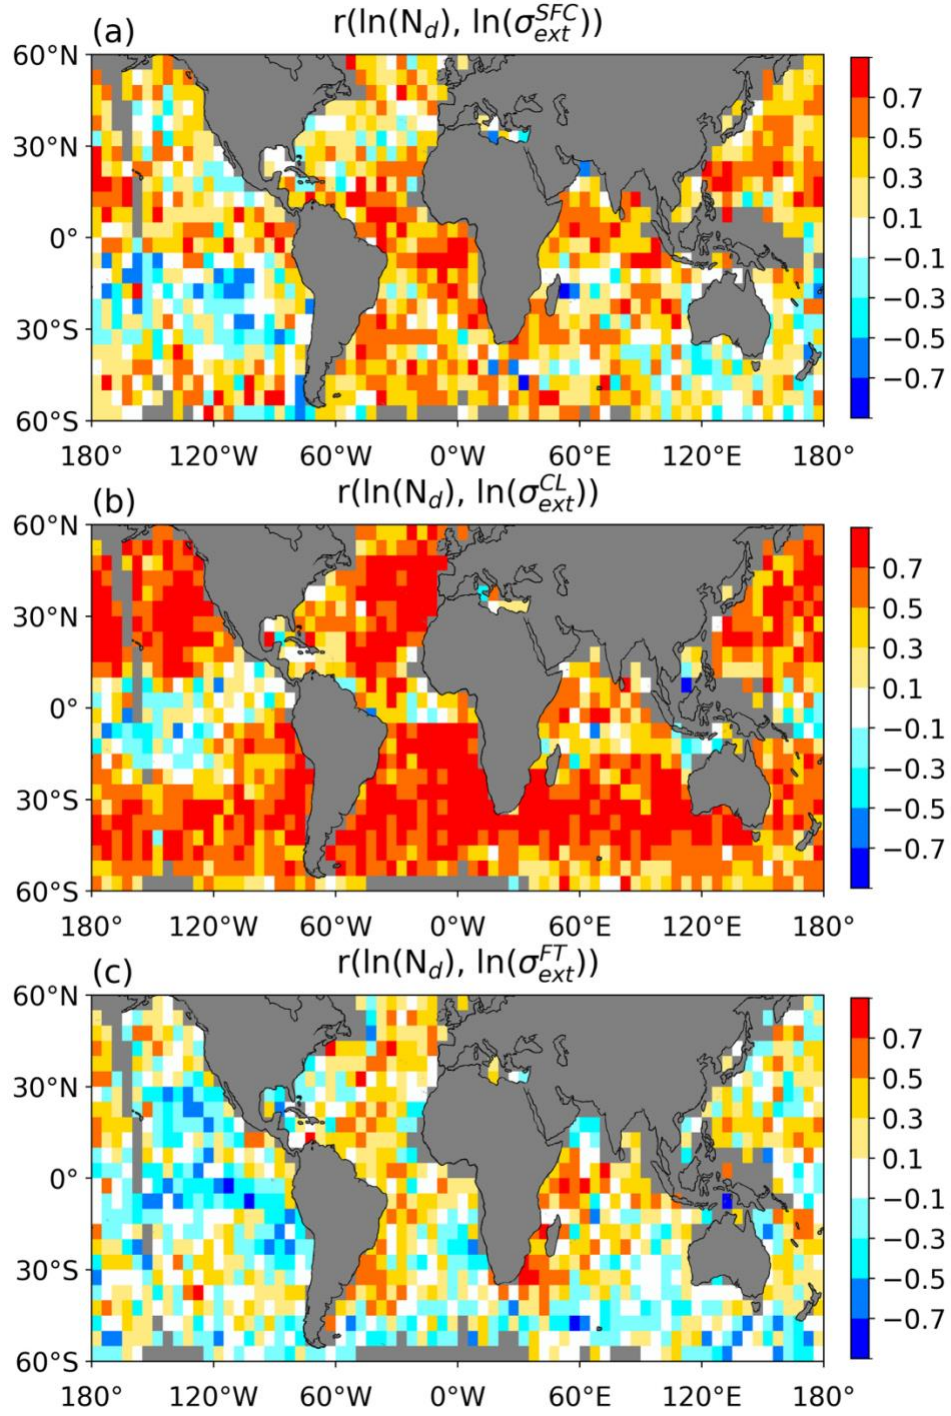

**Figure S1: Gridded maps of Pearson correlation coefficient between MODIS  $N_d$  and (a) surface layer  $\sigma_{ext}$  ( $\sigma_{ext}^{SFC}$ ), (b) cloud level  $\sigma_{ext}$  ( $\sigma_{ext}^{CL}$ ), and (c) free tropospheric  $\sigma_{ext}$  ( $\sigma_{ext}^{FT}$ ). Correlations are estimated after applying the natural logarithm to the variables.**

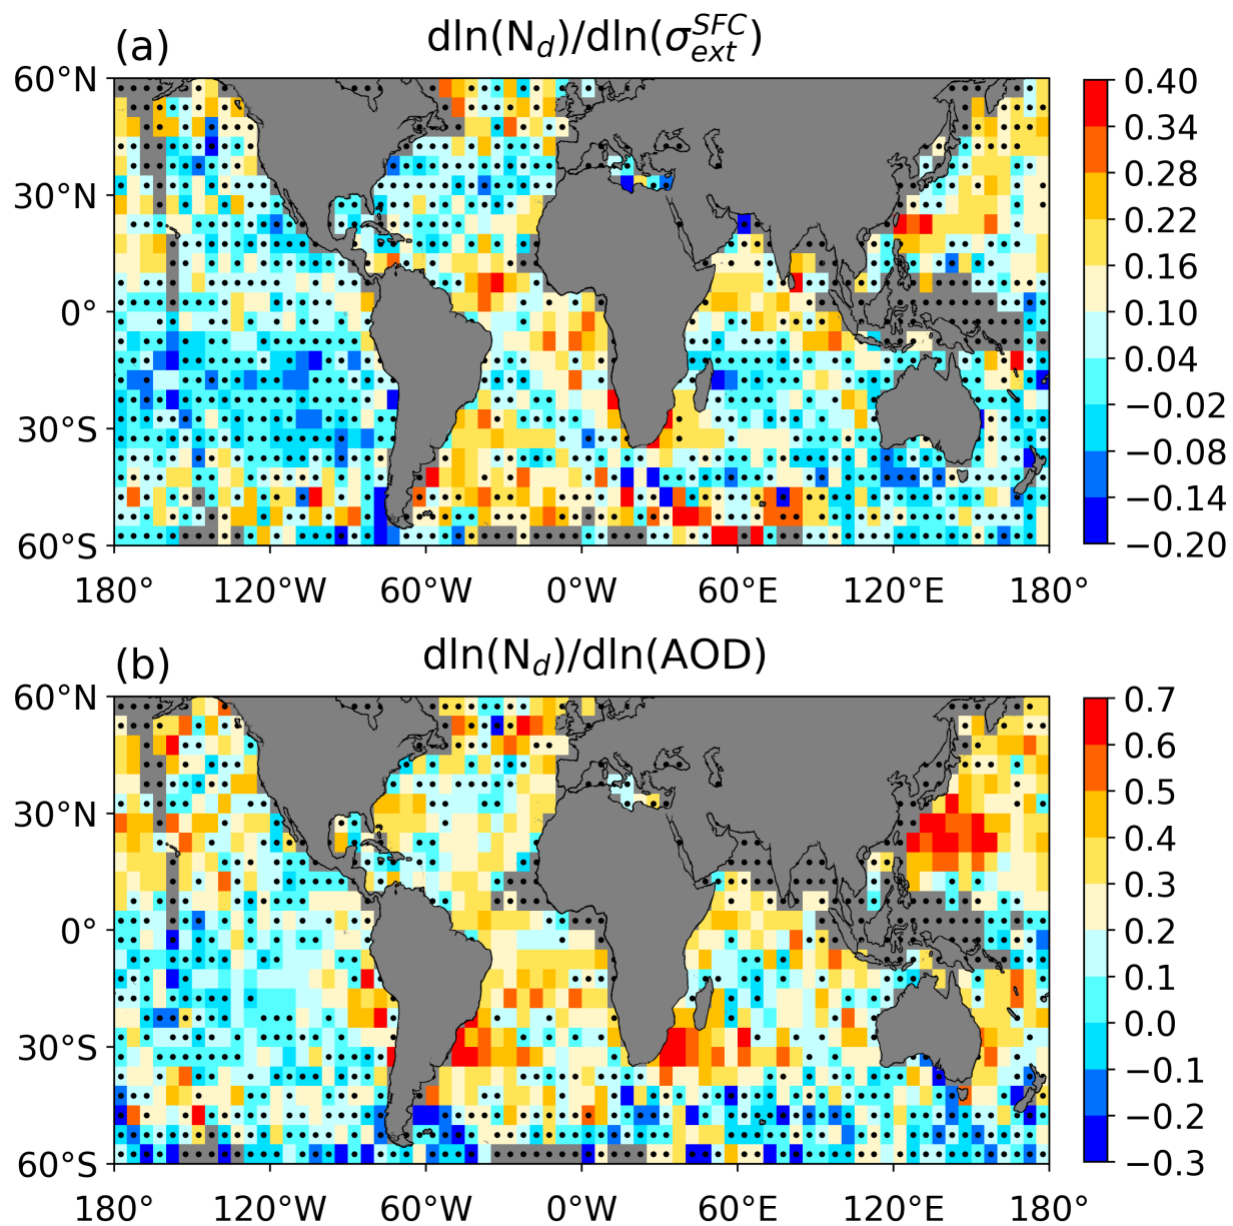

Figure S2: a) Gridded map of ACI index ( $d\ln(N_d)/d\ln(\sigma_{ext}^{SFC})$ ); b) Gridded maps of ACI index  $d\ln(N_d)/d\ln(AOD)$ , estimated from CALIOP-S AOD. Black dots indicate grids that are statistically indistinguishable from zero, according to a Student's t test at 95% confidence level.
